# Supplementary material for: Single-myofiber RNA-sequencing reveals myofiber-level transcriptomic heterogeneity and DUX4 activation in FSHD muscle biopsies
Source: Research Square preprint supplement (doi:10.21203/rs.3.rs-7715788/v1), 2025-10-16
Supplement: Supplementary file 1 [file abd4adcf58d93112b9bae28f.xlsx]

## Sheet: BATCH-1_9.DE-analysis --- 4DUX4
Supplemental Table 2 List of all 500 randomly selected fiber sets for DE analysis
* Highlighted are the sets that by random selection were selected more than 1x (30 in total leaving 470 unique sets)
	Random.set_nr	4x DUX4-pos fibers	4x DUX4-neg fibers
	Random.set_001	S04 S06 S07 S12	S08 S14 S16 S20
	Random.set_002	S04 S06 S07 S12	S08 S09 S18 S19
	Random.set_003	S04 S06 S07 S12	S15 S17 S18 S20
	Random.set_004	S04 S06 S07 S12	S13 S14 S17 S19
	Random.set_005	S04 S06 S07 S12	S05 S08 S15 S20
	Random.set_006	S04 S06 S07 S12	S11 S14 S17 S20
	Random.set_007	S04 S06 S07 S12	S11 S13 S17 S20
	Random.set_008	S04 S06 S07 S12	S03 S13 S18 S20
	Random.set_009	S04 S06 S07 S12	S03 S13 S16 S17
	Random.set_010	S04 S06 S07 S12	S03 S13 S15 S17
	Random.set_011	S04 S06 S07 S12	S08 S11 S15 S20
	Random.set_012	S04 S06 S07 S12	S13 S15 S17 S19
	Random.set_013	S04 S06 S07 S12	S08 S11 S14 S17
	Random.set_014	S04 S06 S07 S12	S03 S09 S11 S19
	Random.set_015	S04 S06 S07 S12	S05 S16 S17 S18
	Random.set_016	S04 S06 S07 S12	S05 S13 S17 S20
	Random.set_017	S04 S06 S07 S12	S08 S11 S14 S16
	Random.set_018	S04 S06 S07 S12	S03 S13 S16 S18
	Random.set_019	S04 S06 S07 S12	S08 S15 S16 S19
	Random.set_020	S04 S06 S07 S12	S05 S13 S14 S17
	Random.set_021	S04 S06 S07 S12	S11 S14 S16 S17
	Random.set_022	S04 S06 S07 S12	S14 S17 S19 S20
	Random.set_023	S04 S06 S07 S12	S05 S09 S16 S19
	Random.set_024	S04 S06 S07 S12	S08 S09 S16 S18
	Random.set_025	S04 S06 S07 S12	S08 S13 S15 S16
	Random.set_026	S04 S06 S07 S12	S11 S14 S18 S20
	Random.set_027	S04 S06 S07 S12	S08 S16 S17 S19
	Random.set_028	S04 S06 S07 S12	S08 S16 S18 S20
	Random.set_029	S04 S06 S07 S12	S05 S08 S17 S18
	Random.set_030	S04 S06 S07 S12	S08 S13 S14 S15
	Random.set_031	S04 S06 S07 S12	S14 S15 S19 S20
	Random.set_032	S04 S06 S07 S12	S05 S09 S11 S20
	Random.set_033	S04 S06 S07 S12	S08 S15 S17 S19
	Random.set_034	S04 S06 S07 S12	S14 S16 S19 S20
	Random.set_035	S04 S06 S07 S12	S05 S13 S14 S15
	Random.set_036	S04 S06 S07 S12	S08 S13 S15 S19
	Random.set_037	S04 S06 S07 S12	S08 S09 S14 S19
	Random.set_038	S04 S06 S07 S12	S11 S15 S18 S20
	Random.set_039	S04 S06 S07 S12	S13 S14 S18 S20
	Random.set_040	S04 S06 S07 S12	S13 S14 S15 S17
	Random.set_041	S04 S06 S07 S12	S08 S09 S11 S18
	Random.set_042	S04 S06 S07 S12	S13 S14 S17 S20
	Random.set_043	S04 S06 S07 S12	S03 S14 S16 S20
	Random.set_044	S04 S06 S07 S12	S05 S09 S14 S18
	Random.set_045	S04 S06 S07 S12	S03 S15 S16 S17
	Random.set_046	S04 S06 S07 S12	S08 S15 S18 S20
	Random.set_047	S04 S06 S07 S12	S03 S09 S11 S17
	Random.set_048	S04 S06 S07 S12	S09 S11 S14 S17
	Random.set_049	S04 S06 S07 S12	S14 S15 S16 S19
	Random.set_050	S04 S06 S07 S12	S17 S18 S19 S20
	Random.set_051	S04 S06 S07 S12	S03 S08 S11 S13
	Random.set_052	S04 S06 S07 S12	S03 S17 S18 S19
	Random.set_053	S04 S06 S07 S12	S09 S13 S16 S17
	Random.set_054	S04 S06 S07 S12	S14 S16 S18 S20
	Random.set_055	S04 S06 S07 S12	S08 S09 S17 S20
	Random.set_056	S04 S06 S07 S12	S08 S14 S15 S20
	Random.set_057	S04 S06 S07 S12	S03 S09 S16 S19
	Random.set_058	S04 S06 S07 S12	S03 S08 S18 S19
	Random.set_059	S04 S06 S07 S12	S05 S14 S15 S18
	Random.set_060	S04 S06 S07 S12	S05 S09 S14 S20
	Random.set_061	S04 S06 S07 S12	S03 S11 S15 S17
	Random.set_062	S04 S06 S07 S12	S09 S14 S19 S20
	Random.set_063	S04 S06 S07 S12	S11 S15 S16 S17
	Random.set_064	S04 S06 S07 S12	S14 S15 S16 S20
	Random.set_065	S04 S06 S07 S12	S03 S09 S14 S18
	Random.set_066	S04 S06 S07 S12	S05 S09 S14 S16
	Random.set_067	S04 S06 S07 S12	S08 S11 S17 S20
	Random.set_068	S04 S06 S07 S12	S03 S09 S15 S19
	Random.set_069	S04 S06 S07 S12	S05 S08 S15 S18
	Random.set_070	S04 S06 S07 S12	S09 S13 S14 S19
	Random.set_071	S04 S06 S07 S12	S09 S16 S18 S20
	Random.set_072	S04 S06 S07 S12	S05 S11 S18 S19
	Random.set_073	S04 S06 S07 S12	S09 S14 S16 S17
	Random.set_074	S04 S06 S07 S12	S08 S11 S13 S18
	Random.set_075	S04 S06 S07 S12	S03 S05 S11 S20
	Random.set_076	S04 S06 S07 S12	S09 S14 S17 S20
	Random.set_077	S04 S06 S07 S12	S11 S15 S17 S18
	Random.set_078	S04 S06 S07 S12	S09 S13 S16 S18
	Random.set_079	S04 S06 S07 S12	S03 S11 S13 S14
	Random.set_080	S04 S06 S07 S12	S13 S15 S16 S20
	Random.set_081	S04 S06 S07 S12	S13 S14 S17 S18
	Random.set_082	S04 S06 S07 S12	S03 S16 S18 S20
	Random.set_083	S04 S06 S07 S12	S09 S13 S14 S16
	Random.set_084	S04 S06 S07 S12	S09 S14 S15 S18
	Random.set_085	S04 S06 S07 S12	S03 S14 S16 S19
	Random.set_086	S04 S06 S07 S12	S03 S15 S17 S19
	Random.set_087	S04 S06 S07 S12	S05 S16 S19 S20
	Random.set_088	S04 S06 S07 S12	S09 S15 S16 S17
	Random.set_089	S04 S06 S07 S12	S05 S11 S13 S17
	Random.set_090	S04 S06 S07 S12	S03 S08 S11 S19
	Random.set_091	S04 S06 S07 S12	S03 S14 S17 S19
	Random.set_092	S04 S06 S07 S12	S14 S17 S18 S20
	Random.set_093	S04 S06 S07 S12	S03 S09 S14 S19
	Random.set_094	S04 S06 S07 S12	S03 S14 S15 S20
	Random.set_095	S04 S06 S07 S12	S11 S13 S14 S17
	Random.set_096	S04 S06 S07 S12	S11 S15 S18 S19
	Random.set_097	S04 S06 S07 S12	S13 S14 S15 S18
	Random.set_098	S04 S06 S07 S12	S15 S16 S17 S20
	Random.set_099	S04 S06 S07 S12	S05 S08 S18 S20
	Random.set_100	S04 S06 S07 S12	S08 S09 S14 S20
	Random.set_101	S04 S06 S07 S12	S03 S18 S19 S20
	Random.set_102	S04 S06 S07 S12	S03 S05 S09 S13
	Random.set_103	S04 S06 S07 S12	S03 S08 S09 S16
	Random.set_104	S04 S06 S07 S12	S08 S11 S13 S16
	Random.set_105	S04 S06 S07 S12	S11 S15 S16 S18
	Random.set_106	S04 S06 S07 S12	S03 S11 S16 S20
	Random.set_107	S04 S06 S07 S12	S09 S14 S16 S18
	Random.set_108	S04 S06 S07 S12	S03 S08 S13 S14
	Random.set_109	S04 S06 S07 S12	S03 S05 S19 S20
	Random.set_110	S04 S06 S07 S12	S05 S09 S13 S17
	Random.set_111	S04 S06 S07 S12	S13 S14 S19 S20
	Random.set_112	S04 S06 S07 S12	S03 S11 S15 S19
	Random.set_113	S04 S06 S07 S12	S09 S11 S17 S19
	Random.set_114	S04 S06 S07 S12	S05 S09 S18 S20
	Random.set_115	S04 S06 S07 S12	S11 S16 S17 S19
	Random.set_116	S04 S06 S07 S12	S05 S08 S11 S18
	Random.set_117	S04 S06 S07 S12	S08 S11 S14 S19
	Random.set_118	S04 S06 S07 S12	S03 S13 S14 S20
	Random.set_119	S04 S06 S07 S12	S08 S09 S15 S17
	Random.set_120	S04 S06 S07 S12	S13 S16 S17 S20
	Random.set_121	S04 S06 S07 S12	S03 S09 S14 S20
	Random.set_122	S04 S06 S07 S12	S16 S17 S19 S20
	Random.set_123	S04 S06 S07 S12	S03 S08 S11 S17
	Random.set_124	S04 S06 S07 S12	S05 S14 S19 S20
	Random.set_125	S04 S06 S07 S12	S13 S15 S16 S18
	Random.set_126	S04 S06 S07 S12	S03 S05 S13 S19
	Random.set_127	S04 S06 S07 S12	S09 S11 S18 S20
	Random.set_128	S04 S06 S07 S12	S08 S14 S15 S16
	Random.set_129	S04 S06 S07 S12	S03 S08 S16 S18
	Random.set_130	S04 S06 S07 S12	S05 S15 S16 S19
	Random.set_131	S04 S06 S07 S12	S03 S05 S18 S20
	Random.set_132	S04 S06 S07 S12	S05 S08 S14 S19
	Random.set_133	S04 S06 S07 S12	S03 S09 S14 S17
	Random.set_134	S04 S06 S07 S12	S13 S14 S15 S19
	Random.set_135	S04 S06 S07 S12	S13 S14 S15 S16
	Random.set_136	S04 S06 S07 S12	S05 S08 S11 S15
	Random.set_137	S04 S06 S07 S12	S05 S09 S16 S17
	Random.set_138	S04 S06 S07 S12	S13 S17 S18 S19
	Random.set_139	S04 S06 S07 S12	S08 S13 S16 S19
	Random.set_140	S04 S06 S07 S12	S03 S05 S08 S09
	Random.set_141	S04 S06 S07 S12	S09 S15 S17 S20
	Random.set_142	S04 S06 S07 S12	S15 S18 S19 S20
	Random.set_143	S04 S06 S07 S12	S09 S13 S15 S18
	Random.set_144	S04 S06 S07 S12	S05 S09 S15 S16
	Random.set_145	S04 S06 S07 S12	S13 S14 S16 S20
	Random.set_146	S04 S06 S07 S12	S11 S13 S14 S18
	Random.set_147	S04 S06 S07 S12	S05 S08 S09 S15
	Random.set_148	S04 S06 S07 S12	S05 S08 S09 S13
	Random.set_149	S04 S06 S07 S12	S05 S13 S18 S20
	Random.set_150	S04 S06 S07 S12	S03 S14 S19 S20
	Random.set_151	S04 S06 S07 S12	S09 S17 S19 S20
	Random.set_152	S04 S06 S07 S12	S14 S18 S19 S20
	Random.set_153	S04 S06 S07 S12	S14 S16 S17 S20
	Random.set_154	S04 S06 S07 S12	S03 S09 S11 S18
	Random.set_155	S04 S06 S07 S12	S03 S09 S13 S14
	Random.set_156	S04 S06 S07 S12	S11 S15 S19 S20
	Random.set_157	S04 S06 S07 S12	S03 S13 S17 S20
	Random.set_158	S04 S06 S07 S12	S08 S15 S16 S18
	Random.set_159	S04 S06 S07 S12	S05 S11 S13 S20
	Random.set_160	S04 S06 S07 S12	S11 S14 S15 S18
	Random.set_161	S04 S06 S07 S12	S03 S15 S16 S20
	Random.set_162	S04 S06 S07 S12	S03 S05 S15 S18
	Random.set_163	S04 S06 S07 S12	S13 S15 S18 S20
	Random.set_164	S04 S06 S07 S12	S05 S08 S11 S14
	Random.set_165	S04 S06 S07 S12	S08 S16 S17 S20
	Random.set_166	S04 S06 S07 S12	S05 S09 S11 S15
	Random.set_167	S04 S06 S07 S12	S08 S13 S15 S17
	Random.set_168	S04 S06 S07 S12	S08 S17 S18 S19
	Random.set_169	S04 S06 S07 S12	S05 S08 S09 S18
	Random.set_170	S04 S06 S07 S12	S05 S08 S11 S16
	Random.set_171	S04 S06 S07 S12	S05 S16 S17 S20
	Random.set_172	S04 S06 S07 S12	S09 S14 S15 S19
	Random.set_173	S04 S06 S07 S12	S03 S05 S17 S18
	Random.set_174	S04 S06 S07 S12	S09 S11 S13 S19
	Random.set_175	S04 S06 S07 S12	S05 S11 S16 S20
	Random.set_176	S04 S06 S07 S12	S09 S11 S16 S17
	Random.set_177	S04 S06 S07 S12	S05 S13 S16 S20
	Random.set_178	S04 S06 S07 S12	S11 S13 S16 S17
	Random.set_179	S04 S06 S07 S12	S09 S15 S19 S20
	Random.set_180	S04 S06 S07 S12	S05 S08 S15 S19
	Random.set_181	S04 S06 S07 S12	S11 S16 S18 S20
	Random.set_182	S04 S06 S07 S12	S05 S15 S16 S18
	Random.set_183	S04 S06 S07 S12	S09 S13 S15 S17
	Random.set_184	S04 S06 S07 S12	S05 S14 S16 S19
	Random.set_185	S04 S06 S07 S12	S05 S16 S18 S20
	Random.set_186	S04 S06 S07 S12	S08 S11 S17 S19
	Random.set_187	S04 S06 S07 S12	S09 S13 S15 S20
	Random.set_188	S04 S06 S07 S12	S08 S13 S14 S20
	Random.set_189	S04 S06 S07 S12	S08 S09 S16 S17
	Random.set_190	S04 S06 S07 S12	S03 S08 S16 S17
	Random.set_191	S04 S06 S07 S12	S08 S11 S13 S15
	Random.set_192	S04 S06 S07 S12	S15 S16 S19 S20
	Random.set_193	S04 S06 S07 S12	S09 S16 S18 S19
	Random.set_194	S04 S06 S07 S12	S03 S11 S13 S17
	Random.set_195	S04 S06 S07 S12	S09 S11 S13 S16
	Random.set_196	S04 S06 S07 S12	S05 S08 S16 S19
	Random.set_197	S04 S06 S07 S12	S13 S14 S16 S19
	Random.set_198	S04 S06 S07 S12	S05 S08 S09 S17
	Random.set_199	S04 S06 S07 S12	S05 S09 S11 S19
	Random.set_200	S04 S06 S07 S12	S08 S15 S19 S20
	Random.set_201	S04 S06 S07 S12	S05 S11 S13 S14
	Random.set_202	S04 S06 S07 S12	S05 S11 S16 S19
	Random.set_203	S04 S06 S07 S12	S14 S16 S17 S19
	Random.set_204	S04 S06 S07 S12	S09 S15 S18 S19
	Random.set_205	S04 S06 S07 S12	S11 S16 S18 S19
	Random.set_206	S04 S06 S07 S12	S05 S14 S15 S19
	Random.set_207	S04 S06 S07 S12	S05 S08 S13 S20
	Random.set_208	S04 S06 S07 S12	S11 S15 S17 S19
	Random.set_209	S04 S06 S07 S12	S03 S08 S17 S19
	Random.set_210	S04 S06 S07 S12	S08 S16 S18 S19
	Random.set_211	S04 S06 S07 S12	S08 S11 S13 S20
	Random.set_212	S04 S06 S07 S12	S08 S13 S17 S18
	Random.set_213	S04 S06 S07 S12	S03 S08 S15 S16
	Random.set_214	S04 S06 S07 S12	S05 S14 S16 S20
	Random.set_215	S04 S06 S07 S12	S09 S13 S16 S19
	Random.set_216	S04 S06 S07 S12	S08 S13 S19 S20
	Random.set_217	S04 S06 S07 S12	S05 S09 S11 S13
	Random.set_218	S04 S06 S07 S12	S14 S15 S16 S18
	Random.set_219	S04 S06 S07 S12	S05 S11 S19 S20
	Random.set_220	S04 S06 S07 S12	S05 S11 S14 S20
	Random.set_221	S04 S06 S07 S12	S05 S11 S14 S18
	Random.set_222	S04 S06 S07 S12	S03 S08 S15 S18
	Random.set_223	S04 S06 S07 S12	S05 S11 S18 S20
	Random.set_224	S04 S06 S07 S12	S05 S11 S15 S17
	Random.set_225	S04 S06 S07 S12	S05 S08 S13 S18
	Random.set_226	S04 S06 S07 S12	S08 S17 S19 S20
	Random.set_227	S04 S06 S07 S12	S05 S11 S15 S19
	Random.set_228	S04 S06 S07 S12	S05 S09 S11 S14
	Random.set_229	S04 S06 S07 S12	S11 S13 S14 S16
	Random.set_230	S04 S06 S07 S12	S09 S16 S17 S20
	Random.set_231	S04 S06 S07 S12	S03 S09 S14 S16
	Random.set_232	S04 S06 S07 S12	S08 S09 S15 S19
	Random.set_233	S04 S06 S07 S12	S14 S15 S16 S17
	Random.set_234	S04 S06 S07 S12	S09 S14 S15 S16
	Random.set_235	S04 S06 S07 S12	S03 S05 S11 S19
	Random.set_236	S04 S06 S07 S12	S05 S11 S17 S20
	Random.set_237	S04 S06 S07 S12	S03 S14 S15 S17
	Random.set_238	S04 S06 S07 S12	S05 S08 S19 S20
	Random.set_239	S04 S06 S07 S12	S15 S16 S17 S18
	Random.set_240	S04 S06 S07 S12	S03 S09 S13 S15
	Random.set_241	S04 S06 S07 S12	S03 S09 S18 S19
	Random.set_242	S04 S06 S07 S12	S03 S05 S08 S15
	Random.set_243	S04 S06 S07 S12	S03 S05 S11 S18
	Random.set_244	S04 S06 S07 S12	S08 S15 S17 S20
	Random.set_245	S04 S06 S07 S12	S03 S09 S11 S15
	Random.set_246	S04 S06 S07 S12	S03 S14 S16 S19
	Random.set_247	S04 S06 S07 S12	S03 S05 S17 S19
	Random.set_248	S04 S06 S07 S12	S03 S05 S16 S20
	Random.set_249	S04 S06 S07 S12	S11 S13 S16 S18
	Random.set_250	S04 S06 S07 S12	S08 S14 S17 S20
	Random.set_251	S04 S06 S07 S12	S08 S15 S18 S19
	Random.set_252	S04 S06 S07 S12	S08 S09 S13 S18
	Random.set_253	S04 S06 S07 S12	S08 S09 S14 S16
	Random.set_254	S04 S06 S07 S12	S05 S15 S17 S18
	Random.set_255	S04 S06 S07 S12	S11 S14 S16 S18
	Random.set_256	S04 S06 S07 S12	S03 S05 S14 S15
	Random.set_257	S04 S06 S07 S12	S11 S13 S15 S20
	Random.set_258	S04 S06 S07 S12	S09 S11 S15 S18
	Random.set_259	S04 S06 S07 S12	S08 S09 S17 S19
	Random.set_260	S04 S06 S07 S12	S05 S08 S09 S11
	Random.set_261	S04 S06 S07 S12	S03 S05 S18 S19
	Random.set_262	S04 S06 S07 S12	S03 S08 S17 S20
	Random.set_263	S04 S06 S07 S12	S05 S15 S16 S20
	Random.set_264	S04 S06 S07 S12	S13 S16 S18 S19
	Random.set_265	S04 S06 S07 S12	S03 S14 S18 S19
	Random.set_266	S04 S06 S07 S12	S08 S09 S14 S18
	Random.set_267	S04 S06 S07 S12	S13 S16 S17 S18
	Random.set_268	S04 S06 S07 S12	S05 S13 S14 S19
	Random.set_269	S04 S06 S07 S12	S08 S09 S11 S13
	Random.set_270	S04 S06 S07 S12	S05 S09 S15 S20
	Random.set_271	S04 S06 S07 S12	S03 S08 S16 S20
	Random.set_272	S04 S06 S07 S12	S03 S09 S11 S16
	Random.set_273	S04 S06 S07 S12	S05 S08 S09 S14
	Random.set_274	S04 S06 S07 S12	S09 S13 S19 S20
	Random.set_275	S04 S06 S07 S12	S03 S08 S11 S16
	Random.set_276	S04 S06 S07 S12	S05 S08 S09 S19
	Random.set_277	S04 S06 S07 S12	S03 S05 S15 S16
	Random.set_278	S04 S06 S07 S12	S08 S13 S15 S18
	Random.set_279	S04 S06 S07 S12	S05 S11 S17 S19
	Random.set_280	S04 S06 S07 S12	S03 S16 S17 S19
	Random.set_281	S04 S06 S07 S12	S03 S09 S17 S19
	Random.set_282	S04 S06 S07 S12	S08 S15 S17 S18
	Random.set_283	S04 S06 S07 S12	S11 S14 S15 S17
	Random.set_284	S04 S06 S07 S12	S05 S13 S15 S17
	Random.set_285	S04 S06 S07 S12	S05 S08 S16 S18
	Random.set_286	S04 S06 S07 S12	S13 S17 S19 S20
	Random.set_287	S04 S06 S07 S12	S08 S09 S13 S15
	Random.set_288	S04 S06 S07 S12	S03 S08 S09 S20
	Random.set_289	S04 S06 S07 S12	S13 S14 S18 S19
	Random.set_290	S04 S06 S07 S12	S03 S05 S14 S17
	Random.set_291	S04 S06 S07 S12	S03 S11 S19 S20
	Random.set_292	S04 S06 S07 S12	S05 S09 S17 S19
	Random.set_293	S04 S06 S07 S12	S05 S11 S14 S17
	Random.set_294	S04 S06 S07 S12	S13 S16 S19 S20
	Random.set_295	S04 S06 S07 S12	S03 S09 S15 S17
	Random.set_296	S04 S06 S07 S12	S03 S08 S11 S15
	Random.set_297	S04 S06 S07 S12	S09 S13 S17 S20
	Random.set_298	S04 S06 S07 S12	S05 S11 S13 S19
	Random.set_299	S04 S06 S07 S12	S11 S14 S18 S19
	Random.set_300	S04 S06 S07 S12	S09 S16 S17 S18
	Random.set_301	S04 S06 S07 S12	S03 S09 S13 S18
	Random.set_302	S04 S06 S07 S12	S03 S08 S14 S18
	Random.set_303	S04 S06 S07 S12	S05 S08 S13 S19
	Random.set_304	S04 S06 S07 S12	S03 S13 S16 S19
	Random.set_305	S04 S06 S07 S12	S09 S13 S14 S17
	Random.set_306	S04 S06 S07 S12	S05 S08 S16 S17
	Random.set_307	S04 S06 S07 S12	S09 S11 S16 S18
	Random.set_308	S04 S06 S07 S12	S13 S14 S16 S17
	Random.set_309	S04 S06 S07 S12	S11 S13 S16 S20
	Random.set_310	S04 S06 S07 S12	S11 S13 S18 S20
	Random.set_311	S04 S06 S07 S12	S14 S15 S17 S19
	Random.set_312	S04 S06 S07 S12	S05 S13 S16 S18
	Random.set_313	S04 S06 S07 S12	S09 S16 S17 S20
	Random.set_314	S04 S06 S07 S12	S08 S14 S18 S19
	Random.set_315	S04 S06 S07 S12	S09 S13 S14 S18
	Random.set_316	S04 S06 S07 S12	S09 S13 S15 S16
	Random.set_317	S04 S06 S07 S12	S08 S11 S19 S20
	Random.set_318	S04 S06 S07 S12	S03 S11 S16 S17
	Random.set_319	S04 S06 S07 S12	S11 S16 S17 S18
	Random.set_320	S04 S06 S07 S12	S05 S14 S16 S18
	Random.set_321	S04 S06 S07 S12	S08 S15 S16 S20
	Random.set_322	S04 S06 S07 S12	S05 S17 S18 S20
	Random.set_323	S04 S06 S07 S12	S03 S14 S15 S18
	Random.set_324	S04 S06 S07 S12	S03 S09 S16 S20
	Random.set_325	S04 S06 S07 S12	S03 S11 S14 S15
	Random.set_326	S04 S06 S07 S12	S08 S09 S14 S17
	Random.set_327	S04 S06 S07 S12	S05 S08 S14 S17
	Random.set_328	S04 S06 S07 S12	S05 S13 S14 S18
	Random.set_329	S04 S06 S07 S12	S08 S15 S16 S17
	Random.set_330	S04 S06 S07 S12	S05 S16 S17 S20
	Random.set_331	S04 S06 S07 S12	S05 S11 S16 S18
	Random.set_332	S04 S06 S07 S12	S03 S08 S09 S19
	Random.set_333	S04 S06 S07 S12	S05 S11 S16 S20
	Random.set_334	S04 S06 S07 S12	S03 S13 S14 S18
	Random.set_335	S04 S06 S07 S12	S13 S15 S17 S18
	Random.set_336	S04 S06 S07 S12	S03 S05 S13 S20
	Random.set_337	S04 S06 S07 S12	S05 S09 S11 S17
	Random.set_338	S04 S06 S07 S12	S08 S09 S16 S19
	Random.set_339	S04 S06 S07 S12	S03 S09 S16 S17
	Random.set_340	S04 S06 S07 S12	S03 S08 S15 S19
	Random.set_341	S04 S06 S07 S12	S11 S17 S18 S20
	Random.set_342	S04 S06 S07 S12	S05 S14 S18 S19
	Random.set_343	S04 S06 S07 S12	S03 S08 S18 S20
	Random.set_344	S04 S06 S07 S12	S05 S09 S18 S19
	Random.set_345	S04 S06 S07 S12	S08 S11 S17 S18
	Random.set_346	S04 S06 S07 S12	S08 S09 S11 S15
	Random.set_347	S04 S06 S07 S12	S16 S17 S18 S20
	Random.set_348	S04 S06 S07 S12	S11 S17 S19 S20
	Random.set_349	S04 S06 S07 S12	S03 S08 S16 S19
	Random.set_350	S04 S06 S07 S12	S08 S09 S18 S20
	Random.set_351	S04 S06 S07 S12	S03 S11 S16 S18
	Random.set_352	S04 S06 S07 S12	S05 S13 S18 S19
	Random.set_353	S04 S06 S07 S12	S03 S05 S16 S18
	Random.set_354	S04 S06 S07 S12	S03 S11 S16 S20
	Random.set_355	S04 S06 S07 S12	S08 S11 S15 S17
	Random.set_356	S04 S06 S07 S12	S08 S11 S15 S16
	Random.set_357	S04 S06 S07 S12	S14 S15 S18 S20
	Random.set_358	S04 S06 S07 S12	S08 S09 S16 S20
	Random.set_359	S04 S06 S07 S12	S05 S08 S17 S19
	Random.set_360	S04 S06 S07 S12	S09 S13 S18 S19
	Random.set_361	S04 S06 S07 S12	S03 S11 S17 S19
	Random.set_362	S04 S06 S07 S12	S03 S11 S14 S20
	Random.set_363	S04 S06 S07 S12	S05 S08 S13 S16
	Random.set_364	S04 S06 S07 S12	S03 S08 S14 S16
	Random.set_365	S04 S06 S07 S12	S13 S15 S17 S20
	Random.set_366	S04 S06 S07 S12	S03 S16 S17 S18
	Random.set_367	S04 S06 S07 S12	S15 S16 S17 S19
	Random.set_368	S04 S06 S07 S12	S11 S15 S18 S20
	Random.set_369	S04 S06 S07 S12	S03 S05 S11 S19
	Random.set_370	S04 S06 S07 S12	S09 S11 S13 S14
	Random.set_371	S04 S06 S07 S12	S08 S13 S18 S19
	Random.set_372	S04 S06 S07 S12	S09 S11 S13 S14
	Random.set_373	S04 S06 S07 S12	S03 S11 S17 S19
	Random.set_374	S04 S06 S07 S12	S03 S08 S13 S19
	Random.set_375	S04 S06 S07 S12	S03 S09 S11 S14
	Random.set_376	S04 S06 S07 S12	S11 S14 S19 S20
	Random.set_377	S04 S06 S07 S12	S08 S15 S17 S20
	Random.set_378	S04 S06 S07 S12	S05 S13 S15 S19
	Random.set_379	S04 S06 S07 S12	S11 S13 S14 S20
	Random.set_380	S04 S06 S07 S12	S03 S05 S09 S14
	Random.set_381	S04 S06 S07 S12	S05 S08 S16 S17
	Random.set_382	S04 S06 S07 S12	S03 S09 S17 S20
	Random.set_383	S04 S06 S07 S12	S08 S13 S15 S19
	Random.set_384	S04 S06 S07 S12	S05 S09 S13 S19
	Random.set_385	S04 S06 S07 S12	S05 S09 S13 S18
	Random.set_386	S04 S06 S07 S12	S03 S17 S19 S20
	Random.set_387	S04 S06 S07 S12	S09 S11 S14 S18
	Random.set_388	S04 S06 S07 S12	S11 S13 S19 S20
	Random.set_389	S04 S06 S07 S12	S03 S08 S15 S20
	Random.set_390	S04 S06 S07 S12	S03 S08 S09 S15
	Random.set_391	S04 S06 S07 S12	S14 S15 S17 S18
	Random.set_392	S04 S06 S07 S12	S03 S08 S09 S13
	Random.set_393	S04 S06 S07 S12	S03 S11 S15 S18
	Random.set_394	S04 S06 S07 S12	S03 S14 S16 S17
	Random.set_395	S04 S06 S07 S12	S03 S09 S18 S19
	Random.set_396	S04 S06 S07 S12	S05 S08 S09 S20
	Random.set_397	S04 S06 S07 S12	S03 S09 S11 S15
	Random.set_398	S04 S06 S07 S12	S05 S15 S19 S20
	Random.set_399	S04 S06 S07 S12	S03 S11 S13 S15
	Random.set_400	S04 S06 S07 S12	S05 S09 S11 S18
	Random.set_401	S04 S06 S07 S12	S09 S11 S15 S20
	Random.set_402	S04 S06 S07 S12	S03 S16 S17 S20
	Random.set_403	S04 S06 S07 S12	S11 S14 S15 S19
	Random.set_404	S04 S06 S07 S12	S08 S17 S18 S20
	Random.set_405	S04 S06 S07 S12	S03 S08 S14 S15
	Random.set_406	S04 S06 S07 S12	S03 S09 S13 S16
	Random.set_407	S04 S06 S07 S12	S05 S15 S17 S20
	Random.set_408	S04 S06 S07 S12	S03 S16 S18 S19
	Random.set_409	S04 S06 S07 S12	S14 S16 S17 S19
	Random.set_410	S04 S06 S07 S12	S03 S05 S09 S18
	Random.set_411	S04 S06 S07 S12	S03 S05 S11 S17
	Random.set_412	S04 S06 S07 S12	S03 S09 S15 S20
	Random.set_413	S04 S06 S07 S12	S09 S14 S16 S19
	Random.set_414	S04 S06 S07 S12	S03 S05 S15 S19
	Random.set_415	S04 S06 S07 S12	S03 S08 S15 S17
	Random.set_416	S04 S06 S07 S12	S05 S11 S15 S16
	Random.set_417	S04 S06 S07 S12	S08 S13 S16 S17
	Random.set_418	S04 S06 S07 S12	S09 S11 S14 S15
	Random.set_419	S04 S06 S07 S12	S09 S11 S17 S18
	Random.set_420	S04 S06 S07 S12	S03 S11 S14 S18
	Random.set_421	S04 S06 S07 S12	S05 S14 S17 S18
	Random.set_422	S04 S06 S07 S12	S08 S09 S11 S19
	Random.set_423	S04 S06 S07 S12	S05 S15 S17 S19
	Random.set_424	S04 S06 S07 S12	S11 S15 S16 S20
	Random.set_425	S04 S06 S07 S12	S05 S09 S16 S18
	Random.set_426	S04 S06 S07 S12	S03 S08 S14 S19
	Random.set_427	S04 S06 S07 S12	S08 S11 S15 S18
	Random.set_428	S04 S06 S07 S12	S08 S11 S18 S20
	Random.set_429	S04 S06 S07 S12	S05 S09 S14 S17
	Random.set_430	S04 S06 S07 S12	S03 S11 S16 S18
	Random.set_431	S04 S06 S07 S12	S11 S13 S15 S16
	Random.set_432	S04 S06 S07 S12	S05 S16 S17 S20
	Random.set_433	S04 S06 S07 S12	S05 S09 S14 S19
	Random.set_434	S04 S06 S07 S12	S08 S11 S13 S17
	Random.set_435	S04 S06 S07 S12	S03 S14 S18 S20
	Random.set_436	S04 S06 S07 S12	S09 S11 S19 S20
	Random.set_437	S04 S06 S07 S12	S03 S05 S14 S18
	Random.set_438	S04 S06 S07 S12	S09 S18 S19 S20
	Random.set_439	S04 S06 S07 S12	S11 S16 S17 S20
	Random.set_440	S04 S06 S07 S12	S09 S13 S17 S19
	Random.set_441	S04 S06 S07 S12	S11 S13 S16 S19
	Random.set_442	S04 S06 S07 S12	S05 S13 S14 S20
	Random.set_443	S04 S06 S07 S12	S08 S15 S18 S20
	Random.set_444	S04 S06 S07 S12	S13 S14 S17 S18
	Random.set_445	S04 S06 S07 S12	S17 S18 S19 S20
	Random.set_446	S04 S06 S07 S12	S03 S09 S17 S18
	Random.set_447	S04 S06 S07 S12	S05 S13 S16 S19
	Random.set_448	S04 S06 S07 S12	S09 S15 S17 S19
	Random.set_449	S04 S06 S07 S12	S03 S09 S15 S19
	Random.set_450	S04 S06 S07 S12	S03 S14 S15 S16
	Random.set_451	S04 S06 S07 S12	S11 S14 S16 S19
	Random.set_452	S04 S06 S07 S12	S09 S13 S18 S20
	Random.set_453	S04 S06 S07 S12	S08 S13 S14 S16
	Random.set_454	S04 S06 S07 S12	S05 S13 S17 S19
	Random.set_455	S04 S06 S07 S12	S03 S11 S13 S18
	Random.set_456	S04 S06 S07 S12	S14 S15 S17 S20
	Random.set_457	S04 S06 S07 S12	S03 S05 S09 S13
	Random.set_458	S04 S06 S07 S12	S05 S18 S19 S20
	Random.set_459	S04 S06 S07 S12	S08 S14 S18 S20
	Random.set_460	S04 S06 S07 S12	S11 S13 S18 S19
	Random.set_461	S04 S06 S07 S12	S08 S09 S11 S18
	Random.set_462	S04 S06 S07 S12	S05 S08 S14 S20
	Random.set_463	S04 S06 S07 S12	S03 S05 S16 S17
	Random.set_464	S04 S06 S07 S12	S08 S14 S16 S17
	Random.set_465	S04 S06 S07 S12	S08 S14 S16 S19
	Random.set_466	S04 S06 S07 S12	S05 S11 S14 S15
	Random.set_467	S04 S06 S07 S12	S03 S09 S13 S16
	Random.set_468	S04 S06 S07 S12	S03 S14 S17 S18
	Random.set_469	S04 S06 S07 S12	S03 S15 S19 S20
	Random.set_470	S04 S06 S07 S12	S03 S08 S13 S17
	Random.set_471	S04 S06 S07 S12	S03 S09 S18 S20
	Random.set_472	S04 S06 S07 S12	S14 S16 S18 S19
	Random.set_473	S04 S06 S07 S12	S11 S18 S19 S20
	Random.set_474	S04 S06 S07 S12	S09 S11 S13 S20
	Random.set_475	S04 S06 S07 S12	S08 S11 S16 S18
	Random.set_476	S04 S06 S07 S12	S08 S15 S16 S18
	Random.set_477	S04 S06 S07 S12	S03 S05 S11 S16
	Random.set_478	S04 S06 S07 S12	S03 S05 S09 S15
	Random.set_479	S04 S06 S07 S12	S05 S08 S11 S17
	Random.set_480	S04 S06 S07 S12	S09 S16 S17 S19
	Random.set_481	S04 S06 S07 S12	S08 S09 S11 S17
	Random.set_482	S04 S06 S07 S12	S03 S05 S11 S16
	Random.set_483	S04 S06 S07 S12	S09 S13 S15 S18
	Random.set_484	S04 S06 S07 S12	S05 S14 S16 S17
	Random.set_485	S04 S06 S07 S12	S03 S09 S15 S16
	Random.set_486	S04 S06 S07 S12	S03 S14 S15 S18
	Random.set_487	S04 S06 S07 S12	S09 S15 S18 S20
	Random.set_488	S04 S06 S07 S12	S03 S15 S17 S18
	Random.set_489	S04 S06 S07 S12	S08 S11 S13 S14
	Random.set_490	S04 S06 S07 S12	S03 S05 S08 S11
	Random.set_491	S04 S06 S07 S12	S11 S16 S19 S20
	Random.set_492	S04 S06 S07 S12	S15 S16 S18 S19
	Random.set_493	S04 S06 S07 S12	S05 S11 S17 S18
	Random.set_494	S04 S06 S07 S12	S09 S17 S18 S20
	Random.set_495	S04 S06 S07 S12	S08 S13 S16 S20
	Random.set_496	S04 S06 S07 S12	S09 S11 S18 S19
	Random.set_497	S04 S06 S07 S12	S13 S15 S16 S19
	Random.set_498	S04 S06 S07 S12	S08 S09 S17 S20
	Random.set_499	S04 S06 S07 S12	S08 S13 S17 S19
	Random.set_500	S04 S06 S07 S12	S03 S08 S14 S16

## Sheet: Sheet1
		S08 S14 S16 S20	Random.set_001
		S08 S09 S18 S19	Random.set_002
		S15 S17 S18 S20	Random.set_003
		S13 S14 S17 S19	Random.set_004
		S05 S08 S15 S20	Random.set_005
		S11 S14 S17 S20	Random.set_006
		S11 S13 S17 S20	Random.set_007
		S03 S13 S18 S20	Random.set_008
		S03 S13 S16 S17	Random.set_009
		S03 S13 S15 S17	Random.set_010
		S08 S11 S15 S20	Random.set_011
		S13 S15 S17 S19	Random.set_012
		S08 S11 S14 S17	Random.set_013
		S03 S09 S11 S19	Random.set_014
		S05 S16 S17 S18	Random.set_015
		S05 S13 S17 S20	Random.set_016
		S08 S11 S14 S16	Random.set_017
		S03 S13 S16 S18	Random.set_018
		S08 S15 S16 S19	Random.set_019
		S05 S13 S14 S17	Random.set_020
		S11 S14 S16 S17	Random.set_021
		S14 S17 S19 S20	Random.set_022
		S05 S09 S16 S19	Random.set_023
		S08 S09 S16 S18	Random.set_024
		S08 S13 S15 S16	Random.set_025
		S11 S14 S18 S20	Random.set_026
		S08 S16 S17 S19	Random.set_027
		S08 S16 S18 S20	Random.set_028
		S05 S08 S17 S18	Random.set_029
		S08 S13 S14 S15	Random.set_030
		S14 S15 S19 S20	Random.set_031
		S05 S09 S11 S20	Random.set_032
		S08 S15 S17 S19	Random.set_033
		S14 S16 S19 S20	Random.set_034
		S05 S13 S14 S15	Random.set_035
		S08 S13 S15 S19	Random.set_036
		S08 S09 S14 S19	Random.set_037
		S11 S15 S18 S20	Random.set_038
		S13 S14 S18 S20	Random.set_039
		S13 S14 S15 S17	Random.set_040
		S08 S09 S11 S18	Random.set_041
		S13 S14 S17 S20	Random.set_042
		S03 S14 S16 S20	Random.set_043
		S05 S09 S14 S18	Random.set_044
		S03 S15 S16 S17	Random.set_045
		S08 S15 S18 S20	Random.set_046
		S03 S09 S11 S17	Random.set_047
		S09 S11 S14 S17	Random.set_048
		S14 S15 S16 S19	Random.set_049
		S17 S18 S19 S20	Random.set_050
		S03 S08 S11 S13	Random.set_051
		S03 S17 S18 S19	Random.set_052
		S09 S13 S16 S17	Random.set_053
		S14 S16 S18 S20	Random.set_054
		S08 S09 S17 S20	Random.set_055
		S08 S14 S15 S20	Random.set_056
		S03 S09 S16 S19	Random.set_057
		S03 S08 S18 S19	Random.set_058
		S05 S14 S15 S18	Random.set_059
		S05 S09 S14 S20	Random.set_060
		S03 S11 S15 S17	Random.set_061
		S09 S14 S19 S20	Random.set_062
		S11 S15 S16 S17	Random.set_063
		S14 S15 S16 S20	Random.set_064
		S03 S09 S14 S18	Random.set_065
		S05 S09 S14 S16	Random.set_066
		S08 S11 S17 S20	Random.set_067
		S03 S09 S15 S19	Random.set_068
		S05 S08 S15 S18	Random.set_069
		S09 S13 S14 S19	Random.set_070
		S09 S16 S18 S20	Random.set_071
		S05 S11 S18 S19	Random.set_072
		S09 S14 S16 S17	Random.set_073
		S08 S11 S13 S18	Random.set_074
		S03 S05 S11 S20	Random.set_075
		S09 S14 S17 S20	Random.set_076
		S11 S15 S17 S18	Random.set_077
		S09 S13 S16 S18	Random.set_078
		S03 S11 S13 S14	Random.set_079
		S13 S15 S16 S20	Random.set_080
		S13 S14 S17 S18	Random.set_081
		S03 S16 S18 S20	Random.set_082
		S09 S13 S14 S16	Random.set_083
		S09 S14 S15 S18	Random.set_084
		S03 S14 S16 S19	Random.set_085
		S03 S15 S17 S19	Random.set_086
		S05 S16 S19 S20	Random.set_087
		S09 S15 S16 S17	Random.set_088
		S05 S11 S13 S17	Random.set_089
		S03 S08 S11 S19	Random.set_090
		S03 S14 S17 S19	Random.set_091
		S14 S17 S18 S20	Random.set_092
		S03 S09 S14 S19	Random.set_093
		S03 S14 S15 S20	Random.set_094
		S11 S13 S14 S17	Random.set_095
		S11 S15 S18 S19	Random.set_096
		S13 S14 S15 S18	Random.set_097
		S15 S16 S17 S20	Random.set_098
		S05 S08 S18 S20	Random.set_099
		S08 S09 S14 S20	Random.set_100
		S03 S18 S19 S20	Random.set_101
		S03 S05 S09 S13	Random.set_102
		S03 S08 S09 S16	Random.set_103
		S08 S11 S13 S16	Random.set_104
		S11 S15 S16 S18	Random.set_105
		S03 S11 S16 S20	Random.set_106
		S09 S14 S16 S18	Random.set_107
		S03 S08 S13 S14	Random.set_108
		S03 S05 S19 S20	Random.set_109
		S05 S09 S13 S17	Random.set_110
		S13 S14 S19 S20	Random.set_111
		S03 S11 S15 S19	Random.set_112
		S09 S11 S17 S19	Random.set_113
		S05 S09 S18 S20	Random.set_114
		S11 S16 S17 S19	Random.set_115
		S05 S08 S11 S18	Random.set_116
		S08 S11 S14 S19	Random.set_117
		S03 S13 S14 S20	Random.set_118
		S08 S09 S15 S17	Random.set_119
		S13 S16 S17 S20	Random.set_120
		S03 S09 S14 S20	Random.set_121
		S16 S17 S19 S20	Random.set_122
		S03 S08 S11 S17	Random.set_123
		S05 S14 S19 S20	Random.set_124
		S13 S15 S16 S18	Random.set_125
		S03 S05 S13 S19	Random.set_126
		S09 S11 S18 S20	Random.set_127
		S08 S14 S15 S16	Random.set_128
		S03 S08 S16 S18	Random.set_129
		S05 S15 S16 S19	Random.set_130
		S03 S05 S18 S20	Random.set_131
		S05 S08 S14 S19	Random.set_132
		S03 S09 S14 S17	Random.set_133
		S13 S14 S15 S19	Random.set_134
		S13 S14 S15 S16	Random.set_135
		S05 S08 S11 S15	Random.set_136
		S05 S09 S16 S17	Random.set_137
		S13 S17 S18 S19	Random.set_138
		S08 S13 S16 S19	Random.set_139
		S03 S05 S08 S09	Random.set_140
		S09 S15 S17 S20	Random.set_141
		S15 S18 S19 S20	Random.set_142
		S09 S13 S15 S18	Random.set_143
		S05 S09 S15 S16	Random.set_144
		S13 S14 S16 S20	Random.set_145
		S11 S13 S14 S18	Random.set_146
		S05 S08 S09 S15	Random.set_147
		S05 S08 S09 S13	Random.set_148
		S05 S13 S18 S20	Random.set_149
		S03 S14 S19 S20	Random.set_150
		S09 S17 S19 S20	Random.set_151
		S14 S18 S19 S20	Random.set_152
		S14 S16 S17 S20	Random.set_153
		S03 S09 S11 S18	Random.set_154
		S03 S09 S13 S14	Random.set_155
		S11 S15 S19 S20	Random.set_156
		S03 S13 S17 S20	Random.set_157
		S08 S15 S16 S18	Random.set_158
		S05 S11 S13 S20	Random.set_159
		S11 S14 S15 S18	Random.set_160
		S03 S15 S16 S20	Random.set_161
		S03 S05 S15 S18	Random.set_162
		S13 S15 S18 S20	Random.set_163
		S05 S08 S11 S14	Random.set_164
		S08 S16 S17 S20	Random.set_165
		S05 S09 S11 S15	Random.set_166
		S08 S13 S15 S17	Random.set_167
		S08 S17 S18 S19	Random.set_168
		S05 S08 S09 S18	Random.set_169
		S05 S08 S11 S16	Random.set_170
		S05 S16 S17 S20	Random.set_171
		S09 S14 S15 S19	Random.set_172
		S03 S05 S17 S18	Random.set_173
		S09 S11 S13 S19	Random.set_174
		S05 S11 S16 S20	Random.set_175
		S09 S11 S16 S17	Random.set_176
		S05 S13 S16 S20	Random.set_177
		S11 S13 S16 S17	Random.set_178
		S09 S15 S19 S20	Random.set_179
		S05 S08 S15 S19	Random.set_180
		S11 S16 S18 S20	Random.set_181
		S05 S15 S16 S18	Random.set_182
		S09 S13 S15 S17	Random.set_183
		S05 S14 S16 S19	Random.set_184
		S05 S16 S18 S20	Random.set_185
		S08 S11 S17 S19	Random.set_186
		S09 S13 S15 S20	Random.set_187
		S08 S13 S14 S20	Random.set_188
		S08 S09 S16 S17	Random.set_189
		S03 S08 S16 S17	Random.set_190
		S08 S11 S13 S15	Random.set_191
		S15 S16 S19 S20	Random.set_192
		S09 S16 S18 S19	Random.set_193
		S03 S11 S13 S17	Random.set_194
		S09 S11 S13 S16	Random.set_195
		S05 S08 S16 S19	Random.set_196
		S13 S14 S16 S19	Random.set_197
		S05 S08 S09 S17	Random.set_198
		S05 S09 S11 S19	Random.set_199
		S08 S15 S19 S20	Random.set_200
		S05 S11 S13 S14	Random.set_201
		S05 S11 S16 S19	Random.set_202
		S14 S16 S17 S19	Random.set_203
		S09 S15 S18 S19	Random.set_204
		S11 S16 S18 S19	Random.set_205
		S05 S14 S15 S19	Random.set_206
		S05 S08 S13 S20	Random.set_207
		S11 S15 S17 S19	Random.set_208
		S03 S08 S17 S19	Random.set_209
		S08 S16 S18 S19	Random.set_210
		S08 S11 S13 S20	Random.set_211
		S08 S13 S17 S18	Random.set_212
		S03 S08 S15 S16	Random.set_213
		S05 S14 S16 S20	Random.set_214
		S09 S13 S16 S19	Random.set_215
		S08 S13 S19 S20	Random.set_216
		S05 S09 S11 S13	Random.set_217
		S14 S15 S16 S18	Random.set_218
		S05 S11 S19 S20	Random.set_219
		S05 S11 S14 S20	Random.set_220
		S05 S11 S14 S18	Random.set_221
		S03 S08 S15 S18	Random.set_222
		S05 S11 S18 S20	Random.set_223
		S05 S11 S15 S17	Random.set_224
		S05 S08 S13 S18	Random.set_225
		S08 S17 S19 S20	Random.set_226
		S05 S11 S15 S19	Random.set_227
		S05 S09 S11 S14	Random.set_228
		S11 S13 S14 S16	Random.set_229
		S09 S16 S17 S20	Random.set_230
		S03 S09 S14 S16	Random.set_231
		S08 S09 S15 S19	Random.set_232
		S14 S15 S16 S17	Random.set_233
		S09 S14 S15 S16	Random.set_234
		S03 S05 S11 S19	Random.set_235
		S05 S11 S17 S20	Random.set_236
		S03 S14 S15 S17	Random.set_237
		S05 S08 S19 S20	Random.set_238
		S15 S16 S17 S18	Random.set_239
		S03 S09 S13 S15	Random.set_240
		S03 S09 S18 S19	Random.set_241
		S03 S05 S08 S15	Random.set_242
		S03 S05 S11 S18	Random.set_243
		S08 S15 S17 S20	Random.set_244
		S03 S09 S11 S15	Random.set_245
		S03 S14 S16 S19	Random.set_246
		S03 S05 S17 S19	Random.set_247
		S03 S05 S16 S20	Random.set_248
		S11 S13 S16 S18	Random.set_249
		S08 S14 S17 S20	Random.set_250
		S08 S15 S18 S19	Random.set_251
		S08 S09 S13 S18	Random.set_252
		S08 S09 S14 S16	Random.set_253
		S05 S15 S17 S18	Random.set_254
		S11 S14 S16 S18	Random.set_255
		S03 S05 S14 S15	Random.set_256
		S11 S13 S15 S20	Random.set_257
		S09 S11 S15 S18	Random.set_258
		S08 S09 S17 S19	Random.set_259
		S05 S08 S09 S11	Random.set_260
		S03 S05 S18 S19	Random.set_261
		S03 S08 S17 S20	Random.set_262
		S05 S15 S16 S20	Random.set_263
		S13 S16 S18 S19	Random.set_264
		S03 S14 S18 S19	Random.set_265
		S08 S09 S14 S18	Random.set_266
		S13 S16 S17 S18	Random.set_267
		S05 S13 S14 S19	Random.set_268
		S08 S09 S11 S13	Random.set_269
		S05 S09 S15 S20	Random.set_270
		S03 S08 S16 S20	Random.set_271
		S03 S09 S11 S16	Random.set_272
		S05 S08 S09 S14	Random.set_273
		S09 S13 S19 S20	Random.set_274
		S03 S08 S11 S16	Random.set_275
		S05 S08 S09 S19	Random.set_276
		S03 S05 S15 S16	Random.set_277
		S08 S13 S15 S18	Random.set_278
		S05 S11 S17 S19	Random.set_279
		S03 S16 S17 S19	Random.set_280
		S03 S09 S17 S19	Random.set_281
		S08 S15 S17 S18	Random.set_282
		S11 S14 S15 S17	Random.set_283
		S05 S13 S15 S17	Random.set_284
		S05 S08 S16 S18	Random.set_285
		S13 S17 S19 S20	Random.set_286
		S08 S09 S13 S15	Random.set_287
		S03 S08 S09 S20	Random.set_288
		S13 S14 S18 S19	Random.set_289
		S03 S05 S14 S17	Random.set_290
		S03 S11 S19 S20	Random.set_291
		S05 S09 S17 S19	Random.set_292
		S05 S11 S14 S17	Random.set_293
		S13 S16 S19 S20	Random.set_294
		S03 S09 S15 S17	Random.set_295
		S03 S08 S11 S15	Random.set_296
		S09 S13 S17 S20	Random.set_297
		S05 S11 S13 S19	Random.set_298
		S11 S14 S18 S19	Random.set_299
		S09 S16 S17 S18	Random.set_300
		S03 S09 S13 S18	Random.set_301
		S03 S08 S14 S18	Random.set_302
		S05 S08 S13 S19	Random.set_303
		S03 S13 S16 S19	Random.set_304
		S09 S13 S14 S17	Random.set_305
		S05 S08 S16 S17	Random.set_306
		S09 S11 S16 S18	Random.set_307
		S13 S14 S16 S17	Random.set_308
		S11 S13 S16 S20	Random.set_309
		S11 S13 S18 S20	Random.set_310
		S14 S15 S17 S19	Random.set_311
		S05 S13 S16 S18	Random.set_312
		S09 S16 S17 S20	Random.set_313
		S08 S14 S18 S19	Random.set_314
		S09 S13 S14 S18	Random.set_315
		S09 S13 S15 S16	Random.set_316
		S08 S11 S19 S20	Random.set_317
		S03 S11 S16 S17	Random.set_318
		S11 S16 S17 S18	Random.set_319
		S05 S14 S16 S18	Random.set_320
		S08 S15 S16 S20	Random.set_321
		S05 S17 S18 S20	Random.set_322
		S03 S14 S15 S18	Random.set_323
		S03 S09 S16 S20	Random.set_324
		S03 S11 S14 S15	Random.set_325
		S08 S09 S14 S17	Random.set_326
		S05 S08 S14 S17	Random.set_327
		S05 S13 S14 S18	Random.set_328
		S08 S15 S16 S17	Random.set_329
		S05 S16 S17 S20	Random.set_330
		S05 S11 S16 S18	Random.set_331
		S03 S08 S09 S19	Random.set_332
		S05 S11 S16 S20	Random.set_333
		S03 S13 S14 S18	Random.set_334
		S13 S15 S17 S18	Random.set_335
		S03 S05 S13 S20	Random.set_336
		S05 S09 S11 S17	Random.set_337
		S08 S09 S16 S19	Random.set_338
		S03 S09 S16 S17	Random.set_339
		S03 S08 S15 S19	Random.set_340
		S11 S17 S18 S20	Random.set_341
		S05 S14 S18 S19	Random.set_342
		S03 S08 S18 S20	Random.set_343
		S05 S09 S18 S19	Random.set_344
		S08 S11 S17 S18	Random.set_345
		S08 S09 S11 S15	Random.set_346
		S16 S17 S18 S20	Random.set_347
		S11 S17 S19 S20	Random.set_348
		S03 S08 S16 S19	Random.set_349
		S08 S09 S18 S20	Random.set_350
		S03 S11 S16 S18	Random.set_351
		S05 S13 S18 S19	Random.set_352
		S03 S05 S16 S18	Random.set_353
		S03 S11 S16 S20	Random.set_354
		S08 S11 S15 S17	Random.set_355
		S08 S11 S15 S16	Random.set_356
		S14 S15 S18 S20	Random.set_357
		S08 S09 S16 S20	Random.set_358
		S05 S08 S17 S19	Random.set_359
		S09 S13 S18 S19	Random.set_360
		S03 S11 S17 S19	Random.set_361
		S03 S11 S14 S20	Random.set_362
		S05 S08 S13 S16	Random.set_363
		S03 S08 S14 S16	Random.set_364
		S13 S15 S17 S20	Random.set_365
		S03 S16 S17 S18	Random.set_366
		S15 S16 S17 S19	Random.set_367
		S11 S15 S18 S20	Random.set_368
		S03 S05 S11 S19	Random.set_369
		S09 S11 S13 S14	Random.set_370
		S08 S13 S18 S19	Random.set_371
		S09 S11 S13 S14	Random.set_372
		S03 S11 S17 S19	Random.set_373
		S03 S08 S13 S19	Random.set_374
		S03 S09 S11 S14	Random.set_375
		S11 S14 S19 S20	Random.set_376
		S08 S15 S17 S20	Random.set_377
		S05 S13 S15 S19	Random.set_378
		S11 S13 S14 S20	Random.set_379
		S03 S05 S09 S14	Random.set_380
		S05 S08 S16 S17	Random.set_381
		S03 S09 S17 S20	Random.set_382
		S08 S13 S15 S19	Random.set_383
		S05 S09 S13 S19	Random.set_384
		S05 S09 S13 S18	Random.set_385
		S03 S17 S19 S20	Random.set_386
		S09 S11 S14 S18	Random.set_387
		S11 S13 S19 S20	Random.set_388
		S03 S08 S15 S20	Random.set_389
		S03 S08 S09 S15	Random.set_390
		S14 S15 S17 S18	Random.set_391
		S03 S08 S09 S13	Random.set_392
		S03 S11 S15 S18	Random.set_393
		S03 S14 S16 S17	Random.set_394
		S03 S09 S18 S19	Random.set_395
		S05 S08 S09 S20	Random.set_396
		S03 S09 S11 S15	Random.set_397
		S05 S15 S19 S20	Random.set_398
		S03 S11 S13 S15	Random.set_399
		S05 S09 S11 S18	Random.set_400
		S09 S11 S15 S20	Random.set_401
		S03 S16 S17 S20	Random.set_402
		S11 S14 S15 S19	Random.set_403
		S08 S17 S18 S20	Random.set_404
		S03 S08 S14 S15	Random.set_405
		S03 S09 S13 S16	Random.set_406
		S05 S15 S17 S20	Random.set_407
		S03 S16 S18 S19	Random.set_408
		S14 S16 S17 S19	Random.set_409
		S03 S05 S09 S18	Random.set_410
		S03 S05 S11 S17	Random.set_411
		S03 S09 S15 S20	Random.set_412
		S09 S14 S16 S19	Random.set_413
		S03 S05 S15 S19	Random.set_414
		S03 S08 S15 S17	Random.set_415
		S05 S11 S15 S16	Random.set_416
		S08 S13 S16 S17	Random.set_417
		S09 S11 S14 S15	Random.set_418
		S09 S11 S17 S18	Random.set_419
		S03 S11 S14 S18	Random.set_420
		S05 S14 S17 S18	Random.set_421
		S08 S09 S11 S19	Random.set_422
		S05 S15 S17 S19	Random.set_423
		S11 S15 S16 S20	Random.set_424
		S05 S09 S16 S18	Random.set_425
		S03 S08 S14 S19	Random.set_426
		S08 S11 S15 S18	Random.set_427
		S08 S11 S18 S20	Random.set_428
		S05 S09 S14 S17	Random.set_429
		S03 S11 S16 S18	Random.set_430
		S11 S13 S15 S16	Random.set_431
		S05 S16 S17 S20	Random.set_432
		S05 S09 S14 S19	Random.set_433
		S08 S11 S13 S17	Random.set_434
		S03 S14 S18 S20	Random.set_435
		S09 S11 S19 S20	Random.set_436
		S03 S05 S14 S18	Random.set_437
		S09 S18 S19 S20	Random.set_438
		S11 S16 S17 S20	Random.set_439
		S09 S13 S17 S19	Random.set_440
		S11 S13 S16 S19	Random.set_441
		S05 S13 S14 S20	Random.set_442
		S08 S15 S18 S20	Random.set_443
		S13 S14 S17 S18	Random.set_444
		S17 S18 S19 S20	Random.set_445
		S03 S09 S17 S18	Random.set_446
		S05 S13 S16 S19	Random.set_447
		S09 S15 S17 S19	Random.set_448
		S03 S09 S15 S19	Random.set_449
		S03 S14 S15 S16	Random.set_450
		S11 S14 S16 S19	Random.set_451
		S09 S13 S18 S20	Random.set_452
		S08 S13 S14 S16	Random.set_453
		S05 S13 S17 S19	Random.set_454
		S03 S11 S13 S18	Random.set_455
		S14 S15 S17 S20	Random.set_456
		S03 S05 S09 S13	Random.set_457
		S05 S18 S19 S20	Random.set_458
		S08 S14 S18 S20	Random.set_459
		S11 S13 S18 S19	Random.set_460
		S08 S09 S11 S18	Random.set_461
		S05 S08 S14 S20	Random.set_462
		S03 S05 S16 S17	Random.set_463
		S08 S14 S16 S17	Random.set_464
		S08 S14 S16 S19	Random.set_465
		S05 S11 S14 S15	Random.set_466
		S03 S09 S13 S16	Random.set_467
		S03 S14 S17 S18	Random.set_468
		S03 S15 S19 S20	Random.set_469
		S03 S08 S13 S17	Random.set_470
		S03 S09 S18 S20	Random.set_471
		S14 S16 S18 S19	Random.set_472
		S11 S18 S19 S20	Random.set_473
		S09 S11 S13 S20	Random.set_474
		S08 S11 S16 S18	Random.set_475
		S08 S15 S16 S18	Random.set_476
		S03 S05 S11 S16	Random.set_477
		S03 S05 S09 S15	Random.set_478
		S05 S08 S11 S17	Random.set_479
		S09 S16 S17 S19	Random.set_480
		S08 S09 S11 S17	Random.set_481
		S03 S05 S11 S16	Random.set_482
		S09 S13 S15 S18	Random.set_483
		S05 S14 S16 S17	Random.set_484
		S03 S09 S15 S16	Random.set_485
		S03 S14 S15 S18	Random.set_486
		S09 S15 S18 S20	Random.set_487
		S03 S15 S17 S18	Random.set_488
		S08 S11 S13 S14	Random.set_489
		S03 S05 S08 S11	Random.set_490
		S11 S16 S19 S20	Random.set_491
		S15 S16 S18 S19	Random.set_492
		S05 S11 S17 S18	Random.set_493
		S09 S17 S18 S20	Random.set_494
		S08 S13 S16 S20	Random.set_495
		S09 S11 S18 S19	Random.set_496
		S13 S15 S16 S19	Random.set_497
		S08 S09 S17 S20	Random.set_498
		S08 S13 S17 S19	Random.set_499
		S03 S08 S14 S16	Random.set_500
